# Supplementary material for: The domain organization of the bacterial intermediate filament-like protein crescentin is important for assembly and function
Source: PubMed Central journal article supplement (PMC3087291; doi:10.1002/cm.20505), 2011-02-28
Supplement: NIHMS287652-supplement-Supplementary_Data.pdf [file NIHMS287652-supplement-Supplementary_Data.pdf]

## **Supplementary Text**

### **Functional analysis of intermediate filament protein domain organization of crescentin**

**M. Cabeen, H. Herrmann and C. Jacobs-Wagner**

#### **Contents:**

Supplementary Figure S1

Strain and plasmid modes of construction

PCR primer sequences

References

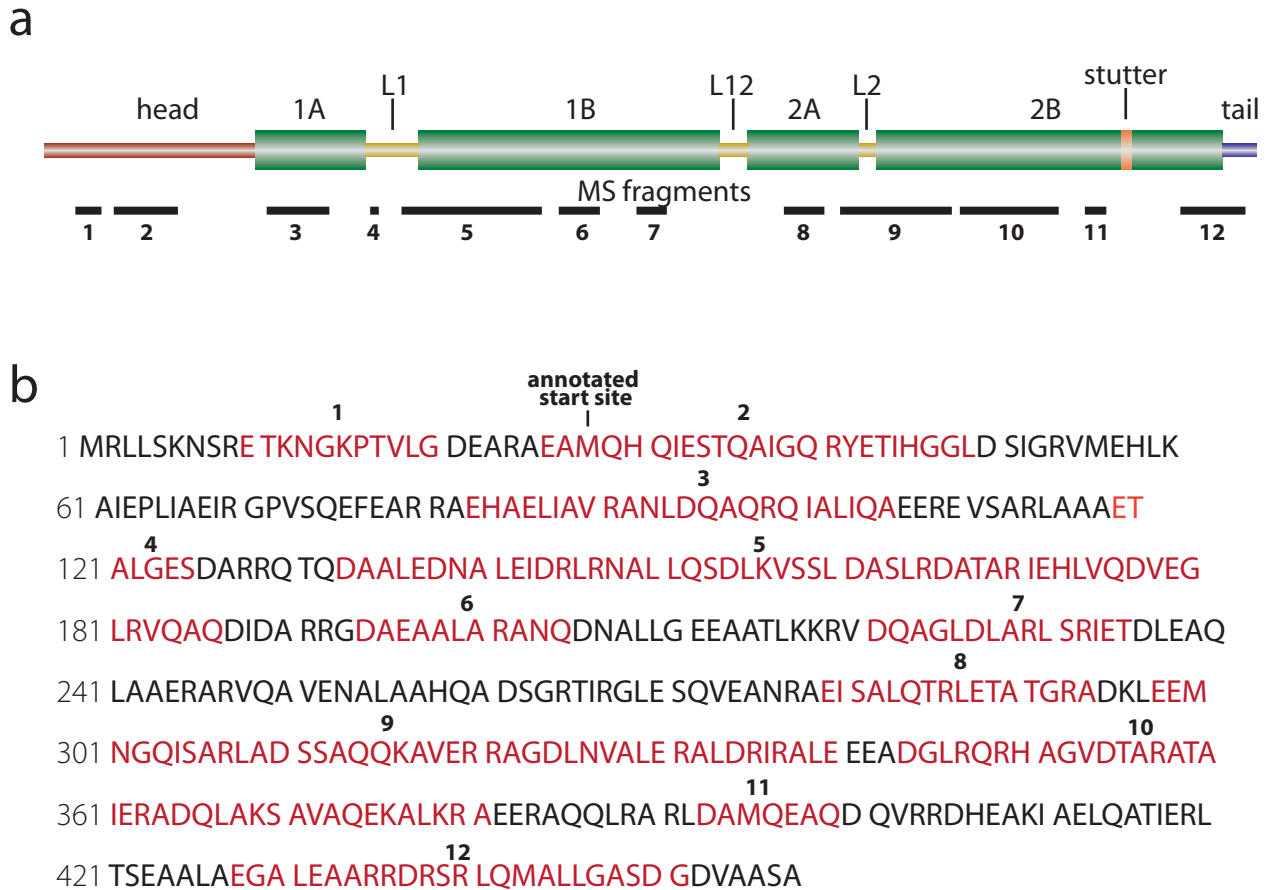

**Figure S1**

**a.** Schematic of crescentin domain organization. Coiled coil-forming regions are indicated by thick green bars; linkers L1, L12, L2, head, tail, and stutter are labeled. Fragments of crescentin protein identified by mass spectrometry are indicated below the diagram. **b.** Detected tryptic fragments of crescentin-FLAG, immunoprecipitated from CJW932 (CB15N *creS*::pJM21*creS*-flag), are indicated in red on the full crescentin sequence.

## **Strain and plasmid modes of construction**

### ***C. crescentus* strains**

#### **CJW1231**

Plasmid pMR20creS-tc was into CB15N.

#### **CJW1474**

Plasmid pMR20creS $\Delta$ T was electroporated into CB15N.

#### **CJW1475**

Plasmid pMR20creS $\Delta$ T was electroporated into CB15N  $\Delta creS$  (LS3812).

#### **CJW1478**

Plasmid pMR20creS $\Delta$ R-tc was electroporated into CB15N.

#### **CJW1518**

Plasmid pMR20creSSAT-tc was electroporated into CB15N  $\Delta creS$  (LS3812).

#### **CJW1520**

Plasmid pMR20creS $\Delta$ L1-tc was electroporated into CB15N.

#### **CJW1521**

Plasmid pMR20creS $\Delta$ L1-tc was electroporated into CB15N  $\Delta creS$  (LS3812).

#### **CJW1522**

Plasmid pMR20creSSAT-tc was electroporated into CB15N.

### **CJW1535**

Plasmid pMR20creS $\Delta$ N28-79-tc was electroporated into CB15N.

### **CJW1536**

Plasmid pMR20creS  $\Delta$ N28-79-tc was electroporated into CB15N  $\Delta$ creS (LS3812).

### **CJW2862**

Plasmid pMR20creS $\Delta$ R-tc was electroporated into CB15N  $\Delta$ creS (LS3812).

### ***E. coli* strains**

### **CJW1353, 1659, 2045, 2054, 3663**

BL21 (DE3) was transformed with the plasmids listed in the strain table by electroporation.

### **Plasmids**

#### **pET29acreS**

creS was excised from pBGENT-NdecreS (**CJW1629**) with NdeI/HindIII and ligated into pET29a cleaved with the same enzymes.

#### **pET29acreS $\Delta$ N27**

creS $\Delta$ N27 was excised from pKS-NdecreS $\Delta$ N27 (**CJW912**) with NdeI/HindIII and ligated into pET29a cleaved with the same enzymes.

#### **pET29acreS $\Delta$ L1**

Replaced the wild-type allele with the *creS<sub>ΔL1</sub>* allele by replacing an NcoI/StuI fragment from pHL23PxylcreS with the corresponding ΔL1 fragment, generating pHL23PxylcreSΔL1. Excised *creS<sub>ΔL1</sub>* from this plasmid with NdeI/HindIII and ligated into pET29a cleaved with the same enzymes.

### **pET29acreSSAT**

Ligated the 5' half of *creS*, cleaved from pBGENT-NdecreS (**CJW1629**) with NdeI/StuI, with the 3' half of *creS<sub>SAT</sub>*, cleaved from pHL23creSSAT with StuI/HindIII, into pET29a cleaved with NdeI/HindIII.

### **pET29acreSAT**

Cleaved *creS<sub>ΔT</sub>* from pHL23creSΔT with NdeI/HindIII and ligated into pET29a cleaved with the same enzymes.

### **pMR20creSΔN28-79-tc**

The *creS* gene was amplified with primers 219 and 61, which introduced an NdeI site and a start codon immediately preceding codon 80 of the *creS* coding sequence and a HindIII sequence at the 3' end of *creS*. About 0.5kb of the *creS* 5' UTR, presumably containing *P<sub>creS</sub>* and extending to codon 27 of the *creS* coding sequence, was amplified with primers 60 and 220, introducing an NdeI site at the 3' end and an EcoRI site at the 5' end. The former PCR product was cleaved with NdeI/HindIII, and the latter with EcoRI/NdeI; the cleaved products were ligated together into pKS cleaved with EcoRI/HindIII (forming **pKScreSΔN28-79**). An EcoRI/StuI fragment containing the promoter and 5' third of *creS<sub>ΔN28-79</sub>* was cleaved from pKScreSΔH and ligated with a StuI/HindIII fragment from pKScreS-tc into pMR20 cleaved with EcoRI/HindIII.

### **pMR20creS $\Delta$ R-tc**

The pKScreS plasmid was amplified with primers 246 and 383, representing the 5' UTR up to the fifth heptad repeat of coil 1A, and with primers 384 and 247, representing the last 5 heptad repeats of coil 2B to the end of the cloned sequence. These amplicons were then used in a second PCR to self-prime with 20 nt of overlapping sequence, and were amplified with the nested primers 121 and 269, adding an NdeI site before codon 28 and sequence encoding a tetracysteine tag and HindIII site at the 3' end. This product was cleaved with NdeI and HindIII and triple-ligated with an EcoRI/NdeI fragment containing the 5' UTR of *creS* up to codon 27 into pKS cleaved with EcoRI/HindIII (creating **pKScreS $\Delta$ R**). The insert was then sequenced. This strategy resulted in an amino acid substitution at codon 27 due to the inserted NdeI site; to remove this, pKScreS $\Delta$ R was cleaved with NcoI/HindIII (retaining the  $\Delta$ R deletion) and ligated with an EcoRI/NcoI fragment from pKScreS into pHL23 cleaved with EcoRI and HindIII. The fragment was then cut from pHL23 with EcoRI/HindIII and ligated into pMR20 cut with the same enzymes.

### **pMR20creSAT**

The pKScreS plasmid was amplified with primers 60 and 382, the product of which included the 5' UTR (~500bp, thus including the putative promoter) and replaced codon 445 with a TAA stop codon, thus truncating the last 13 amino acids of the protein, the putative non-helical tail. The primers introduced 5' EcoRI and 3' HindIII; the PCR product was cleaved with these enzymes, ligated into pHL23, and sequenced. The fragment was then cleaved from pHL23 with EcoRI/HindIII and ligated into pMR20 cut with the same enzymes.

### **pMR20creSSAT-tc**

The pKScreS plasmid was amplified with primers 246 and 385, representing the 5' UTR up to codon 405 of the *creS* coding sequence and adding 9 nucleotides encoding Ser-Ala-Thr, and with primers 386 and 247, adding the complement to the nucleotides encoding Ser-Ala-Thr and amplifying codon 406 to the end of the cloned sequence. These amplicons were then used in a second PCR to self-prime with 9 nt of overlapping sequence (coding from Ser-Ala-Thr; SAT), and were amplified with the nested primers 114 and 269 amplifying most of the *creS<sub>SAT</sub>* sequence and adding and sequence encoding a tetracysteine tag and HindIII site at the 3' end. This product was blunt-end cloned into pHL23 cut with EcoRV, sequenced, then cleaved from this plasmid with Sall and HindIII and triple-ligated with an EcoRI/Sall fragment containing the 5' portion of *creS* from pKScreS into pHL23 cleaved with EcoRI and HindIII. The fragment was then cut from pHL23 with EcoRI/HindIII and ligated into pMR20 cut with the same enzymes. According to the MARCOIL algorithm (Delorenzi and Speed 2002), the SAT insertion completely restores the coiled-coil probability that is disrupted in the wild-type sequence.

### PCR Primers

**60** 5' CTTCGCTTGAATCGGCTCGCCCA

**61** 5' CGATGACCATCGTCCTGGCCGA

**114** 5' CGAAACGGCGATCGACCGCCTGCGCAACGC

**121** (NdeI) 5' TCACATATGCAGCACCAGATCGAGTCCA

**219** (NdeI) 5' ACATCACATATGCGTCGCGCCGAGCACGCCGAGCT

**220** (NdeI) 5' ACTATCCATATGCTCGGCGCGAGCTTCATCAC

**246** 5' GTAAAACGACGGCCAGT

**247** 5' CAGGAAACAGCTATGAC

**269** (HindIII) 5'  
ACAAAAGCTTTTAACAACATCCTGGACAACAGGCGCTCGCGGCCACGTCGCCG

**382** (HindIII) 5' ACAAAGCTTTTAGGCCATCTGCAGGCGTGAGCGG

**383** 5' GCTCGGCGATGCGGGCGGAAACCTCGCGTTCCTCG

**384** 5' TTCCGCCC GCATCGCCGAGCTGCAGGCGACCATCG

**385** 5' GG TAGCTGAATCGCGGCGAACCTGGTCTTGCG

**386** 5' TCAGCTACCCACGAGGCGAAGATCGCCGAGC

## **References**

Delorenzi M, Speed T. 2002. An HMM model for coiled-coil domains and a comparison with PSSM-based predictions. *Bioinformatics* 18(4):617-25.
